# Supplementary material for: Quantification of circulating TCR-engineered T cells targeting a human endogenous retrovirus post-adoptive transfer using nanoplate digital PCR
Source: PubMed Central journal article supplement — Mol Ther Methods Clin Dev. 2024 Aug 20;32(3):101324. doi: 10.1016/j.omtm.2024.101324 (PMC11419864; doi:10.1016/j.omtm.2024.101324), 2024-08-20
Supplement: mmc1.pdf [file mmc1.pdf]

**OMTM, Volume 32**

**Supplemental information**

**Quantification of circulating TCR-engineered  
T cells targeting a human endogenous retrovirus  
post-adoptive transfer using nanoplate digital PCR**

**Stefan Barisic, Elena Cherkasova, Rosa Nadal, Xin Tian, Long Chen, Angelina Parrizzi, Robert N. Reger, Gina M. Scurti, Michael I. Nishimura, and Richard W. Childs**

**Table S1:** Characteristics of the infusion products used in this study.

| <b>Patient</b> | <b>Transduction efficiency<br/>(% CD8<sup>+</sup>/CD34<sup>+</sup>)</b> | <b>VCN</b> |
|----------------|-------------------------------------------------------------------------|------------|
| A11-HERVE-3    | 92                                                                      | 1.9        |
| A11-HERVE-10   | 86.2                                                                    | 2.3        |
| A11-HERVE-14   | 90                                                                      | 2          |
